# Supplementary material for: An adsorption–reduction synergistic effect of mesoporous Fe/SiO2–NH2 hollow spheres for the removal of Cr(vi) ions
Source: Royal Society of Chemistry journal article supplement (doi:10.1039/c6ra03172b), 2016-01-01
Supplement: c6ra03172b1.pdf [file c6ra03172b1.pdf]

## *Supplementary Information*

### **Adsorption-Reduction Synergistic Effect of Mesoporous Fe/SiO<sub>2</sub>-NH<sub>2</sub> Hollow Sphere for Removal of Cr(VI) ions**

Honglin Yao,<sup>a†</sup> Qianqian Ding,<sup>a,b†</sup> Hongjian Zhou,<sup>a,\*</sup> Zhenfu Zhao,<sup>a</sup> Gang Liu,<sup>c</sup> and Guozhong Wang<sup>a,\*</sup>

<sup>a</sup>Key Laboratory of Materials Physics, Centre for Environmental and Energy Nanomaterials, Anhui Key Laboratory of Nanomaterials and Nanotechnology, Institute of Solid State Physics, Chinese Academy of Sciences, Hefei 230031, P.R. China

<sup>b</sup> Department of Materials Science and Engineering, University of Science and Technology of China, Hefei, Anhui 230026, P. R. China

<sup>c</sup> Institute of Applied Technology, Hefei Institutes of Physical Science, Chinese Academy of Sciences, Hefei 230031, P.R. China

†These authors contributed equally to this work

\*Corresponding author: [hjzhou@issp.ac.cn](mailto:hjzhou@issp.ac.cn) (H. Zhou); [gzhwang@issp.ac.cn](mailto:gzhwang@issp.ac.cn) (G. Wang); Tel: 0086-55165595616; Fax: 0086-55165591434.

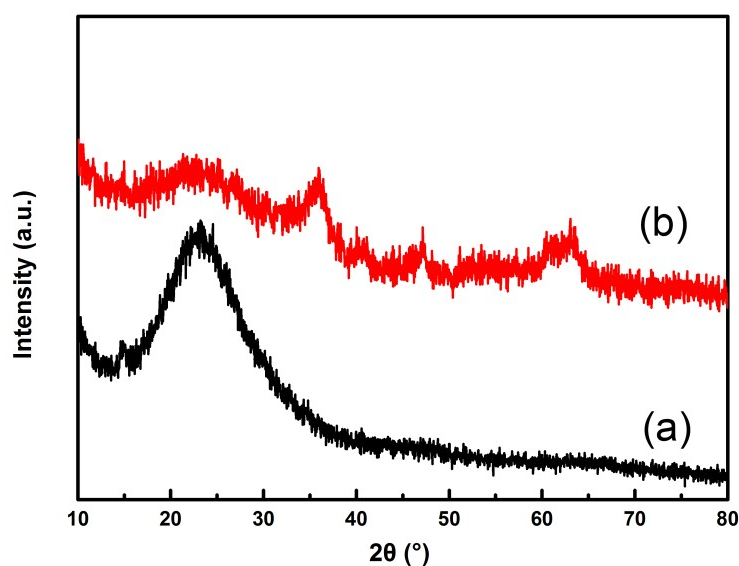

**Fig. S1** XRD patterns of (a) silica colloidal spheres and (b) ISHSs.

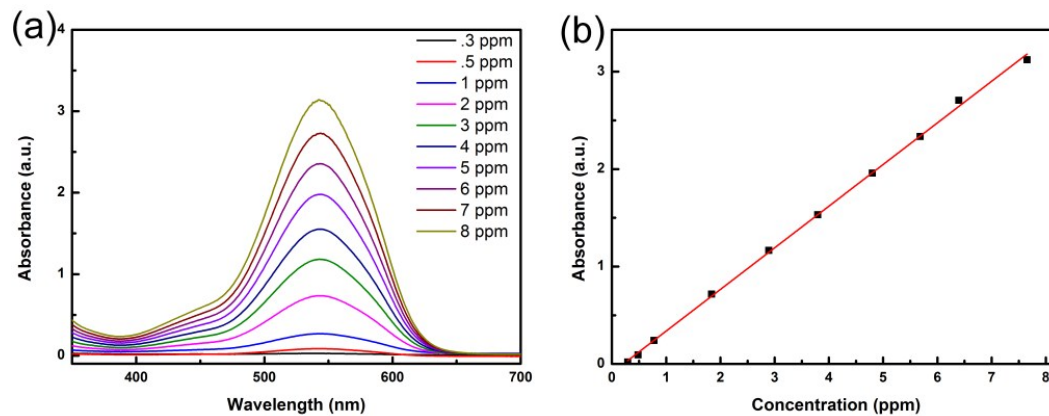

**Fig. S2** (a) UV-Vis spectra of standard Cr(VI) solutions with different concentration; (b) linear relationship between Cr(VI) concentration and UV-Vis absorption.

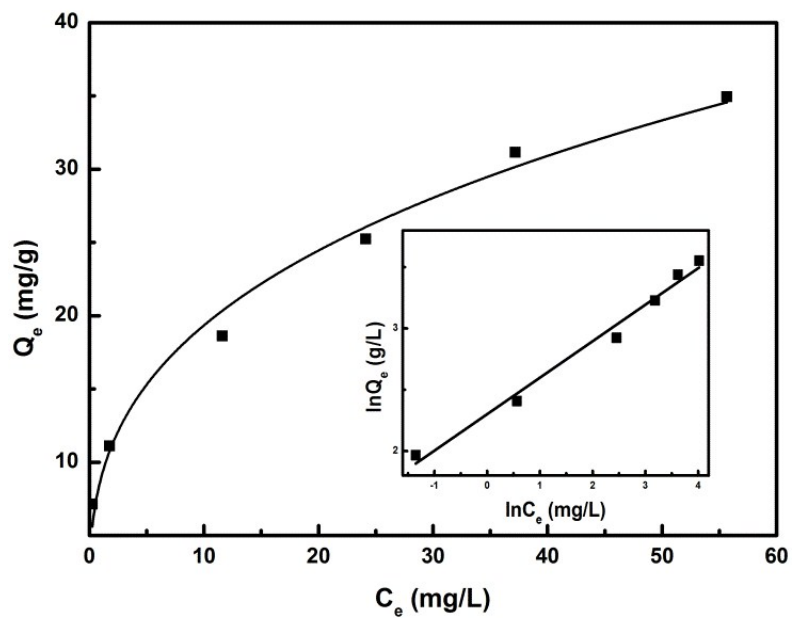

**Fig. S3** Adsorption isotherm of Cr(VI) ions on Fe/SiO<sub>2</sub>-NH<sub>2</sub> HSs at room temperature.

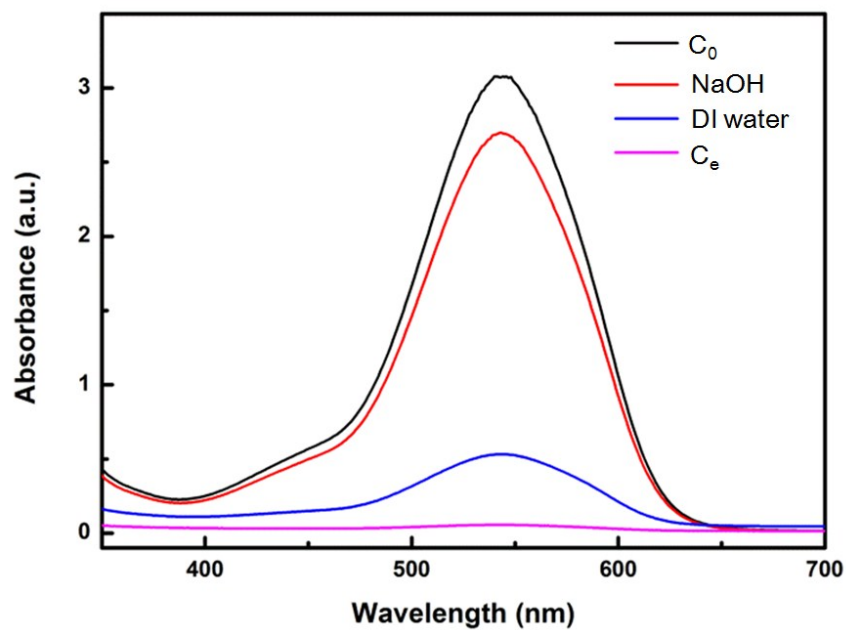

**Fig. S4** UV-Vis spectra of the eluted solutions with deionized (DI) water and NaOH solution.  $C_0$ : initial concentration;  $C_e$ : equilibrium concentration

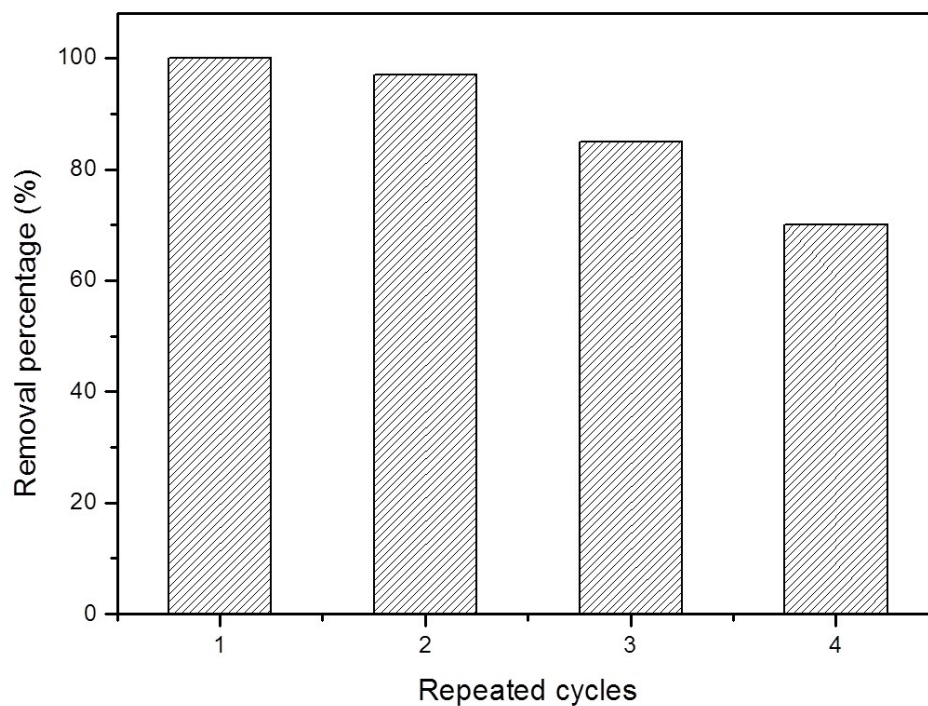

**Fig. S5** Adsorbent recyclable of Cr(VI) ions on Fe/SiO<sub>2</sub>-NH<sub>2</sub> HSs after four cycles.

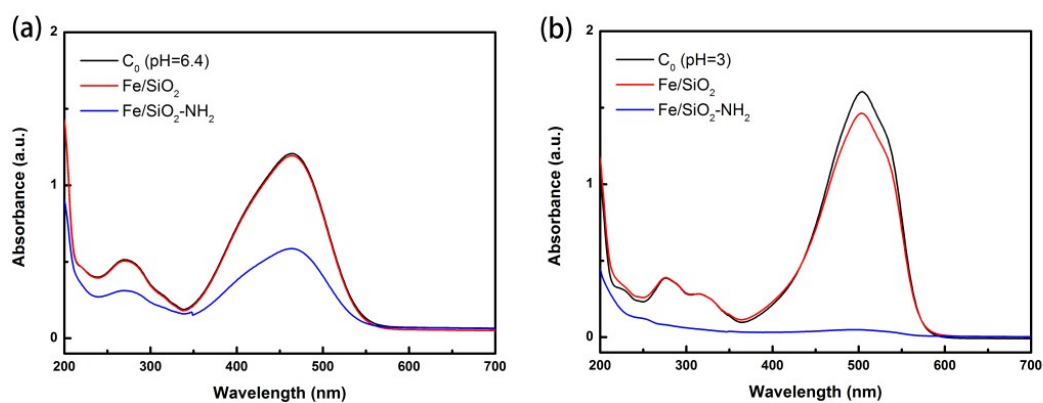

**Fig. S6** UV-Vis spectra of MO solutions after being treated by  $Fe/SiO_2$  HSs and  $Fe/SiO_2-NH_2$  HSs at (a) pH = 6.4 and (b) pH = 3. The initial concentration of MO was  $20\text{ mg L}^{-1}$ .

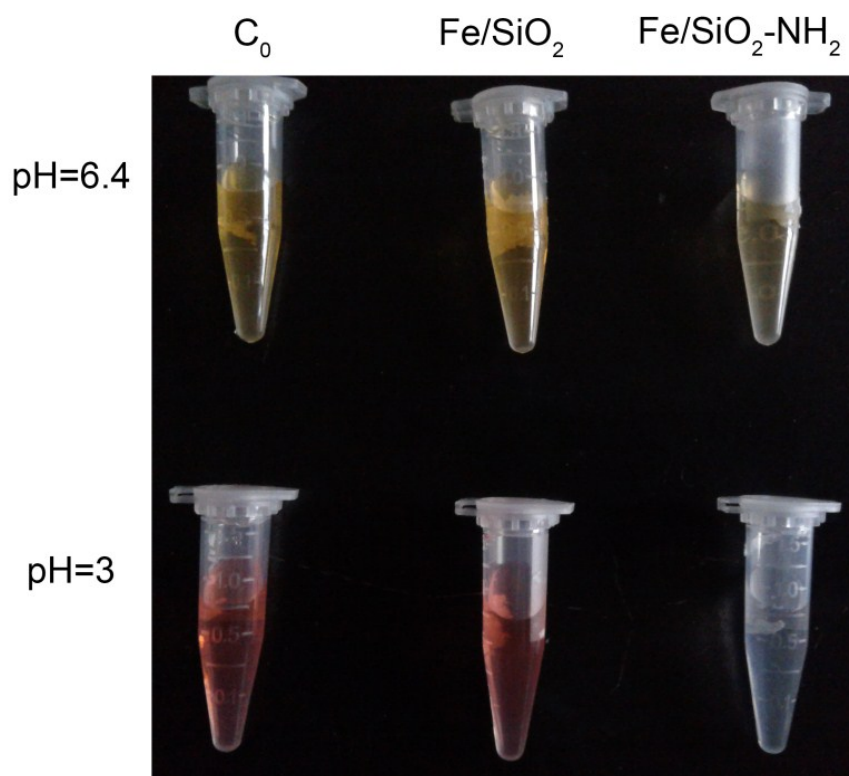

**Fig. S7** The digital camera image of MO solutions after being treated by  $Fe/SiO_2$  HSs and  $Fe/SiO_2-NH_2$  HSs.

**Table S1** Parameters for Langmuir and Freundlich Models of Cr(VI) adsorption on Fe/SiO<sub>2</sub>-NH<sub>2</sub> HSs.

| models     | equations                         | parameters                           |       | R <sup>2</sup> |
|------------|-----------------------------------|--------------------------------------|-------|----------------|
| Langmuir   | $Q_e = \frac{bQ_m C_e}{1 + bC_e}$ | Q <sub>m</sub> (mg·g <sup>-1</sup> ) | b     | 0.836          |
|            |                                   | 37.62                                | 0.116 |                |
| Freundlich | $Q_e = K_f C_e^{\frac{1}{n}}$     | K <sub>f</sub>                       | n     | 0.985          |
|            |                                   | 8.87                                 | 2.95  |                |

**Table S2** The maximal removal capacities ( $q_m$ ) of various adsorbents used for Cr(VI) removal

| Classification | Adsorbents                                | q <sub>m</sub> (mg·g <sup>-1</sup> ) | References |
|----------------|-------------------------------------------|--------------------------------------|------------|
| Large size ZVI | Micron Fe                                 | 19.2                                 | 41         |
|                | Scrap iron                                | 1.75                                 | 42         |
| nZVI           | Bentonite supported nZVI                  | 16.67                                | 43         |
|                | Resin supported nZVI                      | 43.1                                 | 44         |
|                | Bentonite-supported nZVI                  | 7.3                                  | 45         |
|                | Resin-supported nZVI                      | 28                                   | 46         |
|                | Entrapment of nZVI in chitosan beads      | 4                                    | 47         |
|                | Silica fume supported-nZVI                | 88                                   | 48         |
|                | Porous carbon-encapsulated iron           | 10.07                                | 49         |
|                | Fluidized nZVI                            | 10.19                                | 50         |
|                | Iron-doped aerogels                       | 55                                   | 51         |
|                | NZVI/AC                                   | 17.4                                 | 52         |
| nZVI/K-MMT     | 8.95                                      | 53                                   |            |
| Iron oxide     | Magnetic iron-nickel oxide                | 30                                   | 54         |
|                | γ-Fe <sub>2</sub> O <sub>3</sub> -δ-FeOOH | 25.8                                 | 55         |
| This work      | Fe/SiO <sub>2</sub> -NH <sub>2</sub> HSs  | 37.62                                | This work  |

#### Reference List

41. M. Gheju, A. Lovi and I. Balcu, *J Hazard Mater*, 2008, **153**, 655-662.
42. H. S. Cao and W. X. Zhang, *J Hazard Mater*, 2006, **132**, 213-219.
43. L. N. Shi, Y. M. Lin, X. Zhang and Z. L. Chen, *Chem Eng J*, 2011, **171**, 612-617.

44. F. L. Fu, J. Ma, L. P. Xie, B. Tang, W. J. Han and S. Y. Lin, *J Environ Manage*, 2013, **128**, 822-827.
45. L. N. Shi, X. Zhang and Z. L. Chen, *Water Res*, 2011, **45**, 886-892.
46. S. M. Ponder, J. G. Darab and T. E. Mallouk, *Environ Sci Technol*, 2000, **34**, 2564-2569.
47. T. Y. Liu, L. Zhao, D. S. Sun and X. Tan, *J Hazard Mater*, 2010, **184**, 724-730.
48. Y. C. Li, Z. H. Jin, T. L. Li and S. J. Li, *Water Sci Technol*, 2011, **63**, 2781-2787.
49. L. Z. Zhuang, Q. H. Li, J. S. Chen, B. B. Ma and S. X. Chen, *Chem Eng J*, 2014, **253**, 24-33.
50. S. S. Chen, C. Y. Cheng, C. W. Li, P. H. Chai and Y. M. Chang, *J Hazard Mater*, 2007, 142, 362-367.
51. N. K. Verma, P. Khare and N. Verma, *Green Process Synth*, 2015, 4, 37-46.
52. C. H. Xu, L. J. Zhu, X. H. Wang, S. Lin and Y. M. Chen, *Water Air Soil Poll*, 2014, 225.
53. Y. Y. Zhang, H. Jiang, Y. Zhang and J. F. Xie, *Chem Eng J*, 2013, 229, 412-419.
54. L. S. Wei, G. Yang, R. Wang and W. Ma, *J Hazard Mater*, 2009, 164, 1159-1163.
55. J. Hu, I. M. C. Lo and G. H. Chen, *Sep Purif Technol*, 2007, 58, 76-82.
